# Supplementary material
Source: publisher figshare collection journal article supplement (https://gsajournals.figshare.com/ndownloader/files/22772891)
Supplement: Supplementary file 1 [file 22772891]

## Sheet: Table S2 Legend
Table S2: Analysis of full-length bird COI sequences obtained from the RefSeq database. Sequences of all mitochondria-encoded proteins found in the NCBI RefSeq database (release 92) (O’Leary et al. 2016) were downloaded, and the COI FASTA sequences of 645 birds were extracted. MAFFT alignment was performed (Katoh and Standley 2013) using the G-INS-i iterative refinement approach, and those birds …

## Sheet: COI Aves RefSeq Pos 83 and 153
Species (RefSeq entry)	Position 153 (ancestral A in birds, ancestral S in hummingbirds)	Position 83 (ancestral V in birds, ancestral I in hummingbirds)
YP_009341696.1_Amazilia_brevirostris	S	I
YP_009032786.1_Amazilia_versicolor	S	I
YP_009341683.1_Amazilia_millerii	S	V
YP_009341670.1_Amazilia_rondoniae	S	I
YP_009155370.1_Hylocharis_cyanus	S	I
YP_009256153.1_Florisuga_fusca	S	I
YP_009155396.1_Florisuga_mellivora	S	I
YP_009342036.1_Lophornis_magnificus	S	V
YP_009155383.1_Oreotrochilus_melanogaster	S	V
YP_009342023.1_Glaucis_hirsutus	S	V
YP_009256166.1_Phaethornis_malaris	S	I
YP_001586247.1_Archilochus_colubris	S	V
YP_009256140.1_Calliphlox_amethystina	S	V
YP_009256127.1_Heliodoxa_aurescens	S	I
YP_009110571.1_Chrysolampis_mosquitus	S	I
